# Supplementary material for: Size-dependent fracture behavior of GaN pillars under room temperature compression
Source: Royal Society of Chemistry journal article supplement (doi:10.1039/d0nr05400c), 2020-01-01
Supplement: d0nr05400c1.pdf [file d0nr05400c1.pdf]

## Supplementary Information

### Size-induced brittle-to-ductile deformation of GaN pillars under room temperature compression

Sufeng Fan<sup>1</sup>, Xiaocui Li<sup>1</sup>, Rong Fan<sup>1</sup> & Yang Lu<sup>1,2,3,\*</sup>

<sup>1</sup>Department of Mechanical Engineering, City University of Hong Kong, Kowloon, Hong Kong

<sup>2</sup>Department of Materials Science and Engineering, City University of Hong Kong, Kowloon, Hong Kong

<sup>3</sup>Nanomanufacturing Laboratory (NML), City University of Hong Kong Shenzhen Research Institute, Shenzhen 518057, China

\*Corresponding authors: [yanglu@cityu.edu.hk](mailto:yanglu@cityu.edu.hk)

#### Supplementary Video Captions

**Supplementary video 1** *in situ* SEM compression test of a pillar with diameter of  $\sim 1.2\mu\text{m}$  (100 $\times$  accelerated)

**Supplementary video 2** *in situ* SEM compression test of a pillar with diameter of  $\sim 700\text{nm}$  (100 $\times$  accelerated)

**Supplementary video 3** *in situ* SEM compression test of a pillar with diameter of  $\sim 500\text{nm}$  (100 $\times$  accelerated)

**Supplementary video 4** *in situ* TEM compression test of a pillar with diameter of  $\sim 220\text{nm}$  (100 $\times$  accelerated)
